# Supplementary material
Source: Springer Nature journal article supplement (https://www.springermedizin.de/resource/supplementary/12885_2013_3968_MOESM4_ESM.pdf/9464860)
Supplement: MOESM4 [file 9464860]

Over-expression Gene Rank: 580 (in top 5%)

P-value: 1.72E-6

Reporter: 204470\_at

t-Test: 5.070

Fold Change: 3.136

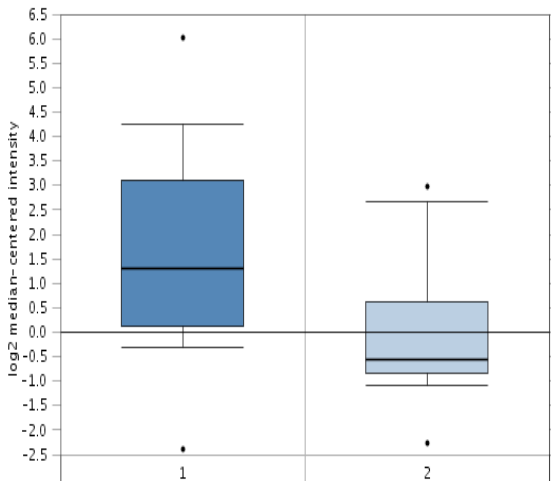**Legend**

1. Infiltrating Bladder Urothelial Carcinoma (81)
2. Superficial Bladder Cancer (28)

**Sanchez-Carbayo Bladder 2**

J Clin Oncol 2006/02/10

157 samples

[CXCL1 Information](#)

mRNA

12,624 measured genes

[Reporter Information](#)

Human Genome U133A Array

Over-expression Gene Rank: 75 (in top 13%)

P-value: 3.77E-6

Reporter: 1689

t-Test: 4.701

Fold Change: 1.305

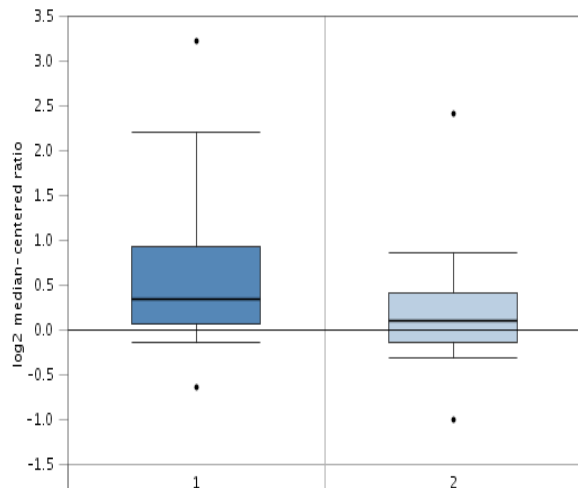**Legend**

1. Infiltrating Bladder Urothelial Carcinoma (99)
2. Superficial Bladder Cancer (706)

**Dyrskjot Bladder 5**

Clin Cancer Res 2007/06/15

808 samples

[CXCL1 Information](#)

mRNA

586 measured genes

[Reporter Information](#)

Platform not pre-defined in OncoPrint

Over-expression Gene Rank: 473 (in top 3%)

P-value: 1.12E-4

Reporter: ILMN\_1787897

t-Test: 3.861

Fold Change: 1.758

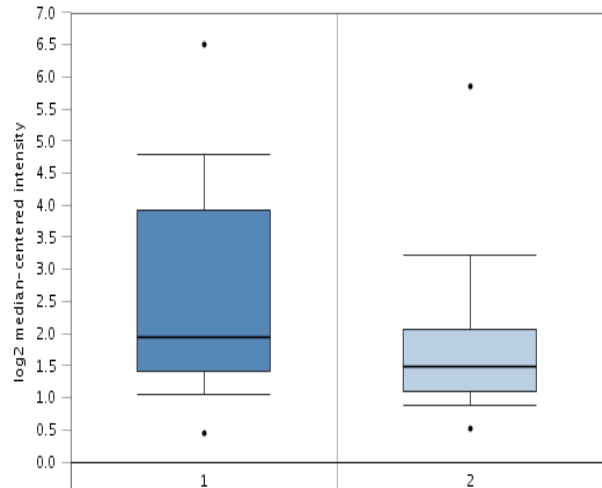**Legend**

1. Infiltrating Bladder Urothelial Carcinoma (62)
2. Superficial Bladder Cancer (126)

**Lee Bladder**

J Clin Oncol 2010/06/01

256 samples

[CXCL1 Information](#)

mRNA

18,846 measured genes

[Reporter Information](#)

Illumina Human-6 v2.0 Expression Beadchip
